1 A comment on “*Species are not most abundant in the centre of their geographic range or climatic niche*”

2

3 Jorge Soberón <sup>(1)(2)</sup>

4 A. Townsend Peterson <sup>(1)(3)</sup>

5 Luis Osorio-Olvera <sup>(3)</sup>

6 (1) Department of Ecology and Evolutionary Biology and Biodiversity Institute, Lawrence, KS 66049,

7 USA.

8 (2) Corresponding author. [jsoberon@ku.edu](mailto:jsoberon@ku.edu).

9 (3) [town@ku.edu](mailto:town@ku.edu)

10 (4) Facultad de Ciencias, Universidad Nacional Autónoma de México, Cd. Universitaria, 04510 Ciudad

11 de México, México. [luismurao@comunidad.unam.mx](mailto:luismurao@comunidad.unam.mx)

12

13 **Running title:** Comment on niche-abundance relationships

14 **Keywords:** population density, niche centrality, niche distances

15 **Technical Comment**, 2 figures, 11 references, 789 words

16

17 **Abstract**

18 A study recently published argued against a relationship between population density and position in

19 geographic and environmental spaces. We found a number of methodological problems underlying the

20 analysis. We discuss the main issues and conclude that these problems hinder a robust conclusion about

21 the original question.

22

23 **Introduction**

24           The question of whether population density is related to position in geographic (Sagarin 2002)  
25 or ecological niche space (Yañez-Arenas et al. 2012, Martínez-Meyer et al. 2013) is important and still  
26 unresolved. In a recent paper in *Ecology Letters*, Dallas et al. (2017) examined the problem using a large  
27 dataset of 118,000 sampled populations of >1400 species birds, mammals, and trees. Dallas et al. (2017)  
28 failed to detect consistent and significant correlations between population density and distance to the  
29 centroids of species' distributions in geographic or environmental spaces, and concluded against the  
30 generality of such distance-density relationships. However, the authors' failure to detect significant  
31 relationships may result from methodological artifacts, rather than to non-existence of such  
32 relationships. We focus on five problems inherent in their analysis.

33

## 34 **Results**

35 1) The largest dataset analyzed by Dallas et al. (2017) was eBird observations (Sullivan et al. 2009),  
36 which are collected without any sampling protocol or plan (there are alternative and better  
37 databases, like the Breeding Bird Survey). eBird has biases frequent among observational data, like  
38 more observers near cities, and more reporting where a species is rare. Therefore, confounding  
39 effects between effort and observer bias may be present, at least for the birds.

40

41 2) Dallas et al. (2017) caution about maximum abundances falling at the periphery of sampled ranges  
42 for two of the datasets that they analyzed, but we still worry that true niche centroids will not be  
43 represented appropriately. Dallas et al. (2017) largely disregarded parts of species' distributions  
44 falling outside the regions for which they had abundance data available. We illustrate this point  
45 using the rodent *Dipodomys merriami* Dallas et al. (2017). Figure 1 shows the spatial minimum  
46 convex hull (CH) for occurrences in the United States (region in gold on map below). This is

47 considerably less extensive than the range outline for this species from IUCN (Patterson et al. 2003).

48 The geographic centroids based on the two range outlines are markedly distinct.

49

50 A similar problem exists in environmental space. We downloaded the 2-dimensional principal

51 components (PC) used by Dallas et al. (2017). For 1799 localities (debugged and thinned to 0.1°, out

52 of 40,000 available via GBIF), we extracted the PC values for each of the points. Figure 1 shows that

53 the range of environmental space in the full distributional area of *Dipodomys merriami* extends into

54 environmental space not represented in the CH used by Dallas et al. (2017).

55

56 3) Dallas et al. (2017) used CHs to characterize ecological niches of species. CHs are sensitive to outliers

57 (Syväranta et al. 2013), and their centroids may be quite distinct from those obtained using robust

58 estimators (Van Aelst and Rousseeuw 2009). In Figure 2, based on the *D. merriami* example, the CH

59 and a minimum volume ellipsoid (MVE) centroids around the same US data are located in very

60 different positions in niche space.

61

62 4) Dallas et al. (2017) use Euclidean distances as measures of distance to niche centroids, which trace

63 equidistant circles around the centroid. A Mahalanobis distance, estimated using the covariance

64 matrix of the observations of the species in question, would be preferable. Figure 2, shows the US

65 distribution of *D. merriami* occurrences, with centroids and outlines of the CH and MVE. Ignoring the

66 covariance in the realized niche of the species contributes extra bias to characterizations of

67 distances in niche space. Dallas et al. (pers. comm.) explored Mahalanobis distances, without finding

68 major differences in the results, an observation deserving further exploration.

69

70 **5)** The data provided in the Supplementary Materials of Dallas et al. (2017) reveal that the population-  
71 density data points have coordinates with precision of 100 m or finer. However, the climate data  
72 used in the paper have a resolution of  $\sim 0.042^\circ$ , or squares of  $\sim 4600$  m on a side. This means that  
73 multiple abundance data points may fall within a single climate pixel, introducing a further problem  
74 in the analysis, as shown in lines 365-370 of the code provided by the authors. Correcting this  
75 methodological problem leaves 40 instead of 81 species for mammals, 49 instead of 63 for fishes  
76 with  $\geq 10$  different abundance/climate points; all of the birds and 165 of the 166 tree species.

77  
78

## 79 **Conclusions**

80 Dallas et al. (2017) provide the largest-scale analysis available to date of relationships between  
81 population density and positions in geographic and environmental spaces. Their negative results  
82 contrast with previous empirical work (Yáñez-Arenas et al. 2012, Martínez-Meyer et al. 2013) and with  
83 theoretical arguments supporting such a relationship (Maguire 1973, Osorio-Olvera et al. 2016).

84 In this communication, we identify a series of methodological problems underlying the results of  
85 Dallas et al. (2017). Although some of them may be of minor importance (e.g., Euclidean vs.  
86 Mahalanobis distances), others may be more significant. We suggest that this important and interesting  
87 problem remains far from settled.

88

## 89 **Literature Cited**

90 Dallas, T., R. R. Decker, and A. Hastings. 2017. Species are not most abundant in the centre of their  
91 geographic range or climatic niche. *Ecology Letters* **20**:1526-1533.  
92 Maguire, B. 1973. Niche response structure and the analytical potentials of its relationship to the  
93 habitat. *American Naturalist* **107**:213-246.  
94 Martínez-Meyer, E., D. Díaz-Porrás, A. T. Peterson, and C. Yáñez-Arenas. 2013. Ecological niche structure  
95 and rangewide abundance patterns of species. *Biology Letters* **9**:20120637.  
96 Osorio-Olvera, L., M. Falconi, and J. Soberón. 2016. Sobre la relación entre idoneidad del hábitat y la  
97 abundancia poblacional bajo diferentes escenarios de dispersión. *Revista Mexicana de*  
98 *Biodiversidad* **87**:1080-1088.

- 99 Patterson, B. D., G. Ceballos, W. Sechrest, M. F. Tognelli, T. Brooks, L. Luna, . . . B. E. Young. 2003. Digital  
100 distribution maps of the mammals of the Western Hemisphere. CD-ROM compiled by  
101 NatureServe.
- 102 Sagarin, R. 2002. The 'abundant centre' distribution: to what extent is it a biogeographical rule? *Ecology*  
103 *Letters* **5**:137-147.
- 104 Sullivan, B. L., C. L. Wood, M. J. Iliff, R. E. Bonney, D. Fink, and S. Kelling. 2009. eBird: A citizen-based bird  
105 observation network in the biological sciences. *Biological Conservation* **142**:2282-2292.
- 106 Syväranta, J., A. Lensu, T. J. Marjomäki, S. Oksanen, and R. I. Jones. 2013. An empirical evaluation of the  
107 utility of convex hull and standard ellipse areas for assessing population niche widths from  
108 stable isotope data. *PLoS ONE* **8**:e56094.
- 109 Van Aelst, S. and P. Rousseeuw. 2009. Minimum volume ellipsoid. *Wiley Interdisciplinary Reviews:*  
110 *Computational Statistics* **1**:71-82.
- 111 Yañez-Arenas, C., E. Martínez-Meyer, S. Mandujano, and O. Rojas-Soto. 2012. Modelling geographic  
112 patterns of population density of the white-tailed deer in central Mexico by implementing  
113 ecological niche theory. *Oikos* **121**:2081-2089.

114

115  
116  
117  
118  
119  
120  
121  
122  
123  
124  
125  
126  
127  
128  
129  
130  
131  
132  
133  
134  
135  
136  
137  
138  
139  
140  
141  
142

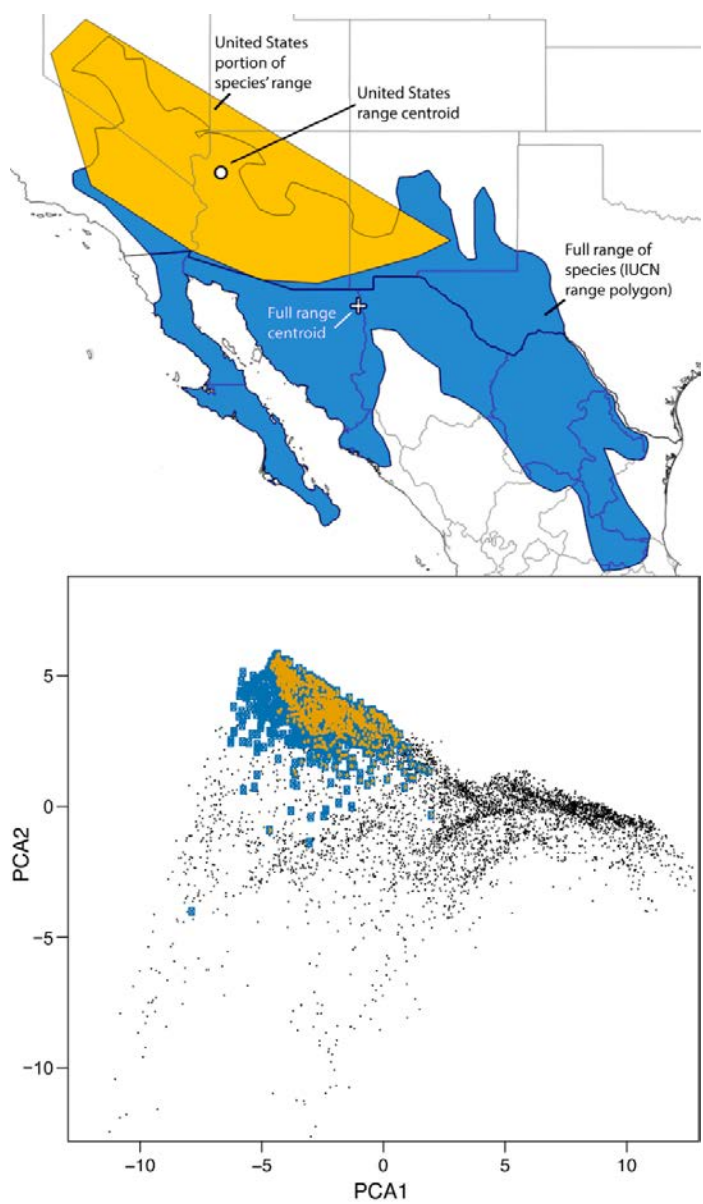

Figure 1. Geographic and environmental spaces for *Dipodomys merriami*. Top: extent of occurrence polygon for the distribution of *D. merriami* in the United States (gold, centroid shown by black and white circle), representing the range area analyzed by Dallas et al. (2017), and the full range of the species (blue, centroid shown as a cross; polygon from IUCN). Note that the true range centroid falls outside of the convex hull analyzed by Dallas et al. (2017). Bottom: 1799 data points from GBIF (see text) in a space of the first two climatic principal components used by Dallas et al. (2017; see text). Points in gold are the reduced portion (United States) of the species range analyzed by Dallas et al. (2017); points in blue cover the entire range of the species.

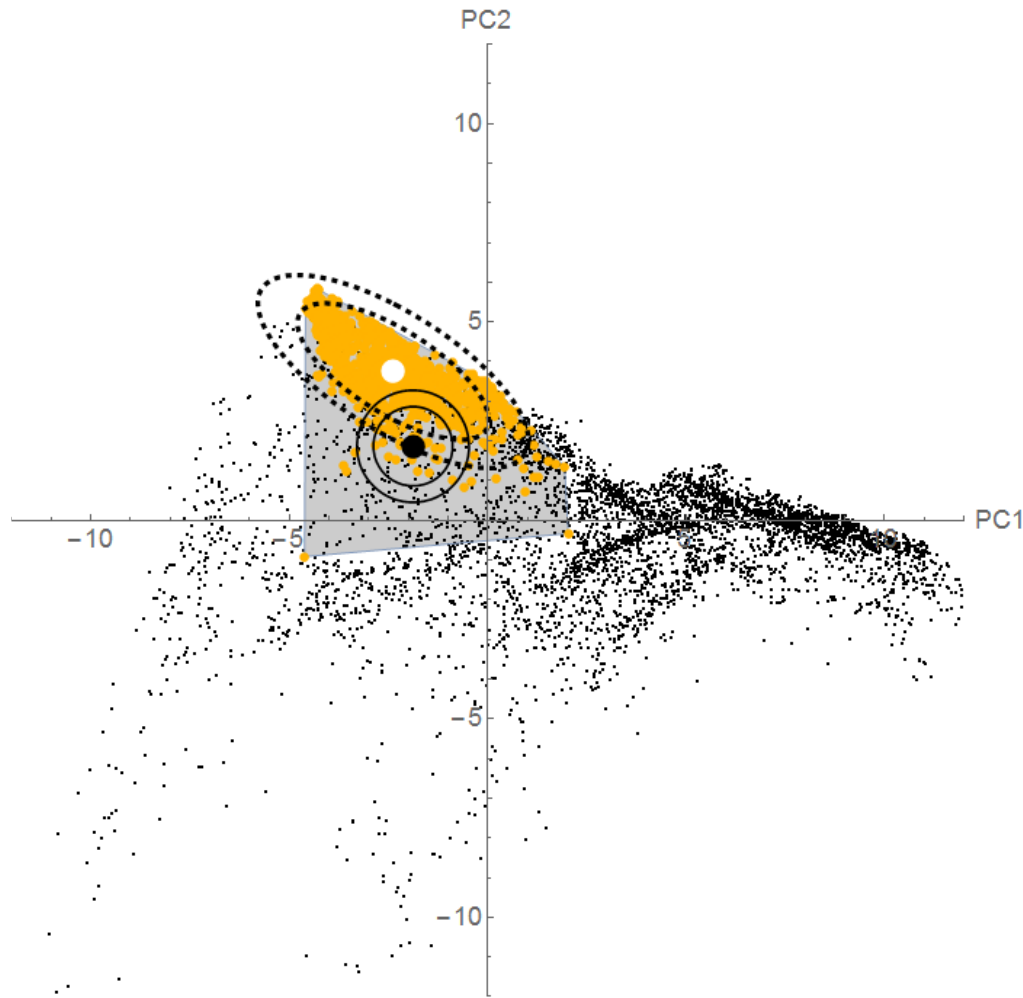

143

144 Figure 2. GBIF points for *Dipodomys merriami* in environmental space, showing differences between  
145 methods for delimiting niches and calculating niche-centroid distances. The black circle is the centroid of  
146 the convex hull (gray-shaded polygon), showing the strong effect of one outlier point. The white circle is  
147 the centroid of a 95% minimum volume ellipsoid that is able to ignore the outlier. Circles are Euclidean  
148 distances of radii 1 and 2, for the convex hull centroid; the dashed ellipsoids are the equivalent distances  
149 (Mahalanobis distances) taking into account the covariance shown by the points in gold (see text). Note  
150 the striking differences between the two methodologies in both shape of the niche estimated and the  
151 distances that result; in particular, note that the centroid estimated via convex hulls falls at the  
152 periphery of the cloud of points for the species' occurrence.

153

154
